# Supplementary material for: Therapeutic Effects of (5R)-5-Hydroxytriptolide on Fibroblast-Like Synoviocytes in Rheumatoid Arthritis via lncRNA WAKMAR2/miR-4478/E2F1/p53 Axis
Source: PubMed Central journal article supplement (PMC7921149; doi:10.3389/fimmu.2021.605616), 2021-02-16
Supplement: Data_Sheet_1.pdf [file Data_Sheet_1.pdf]

**A**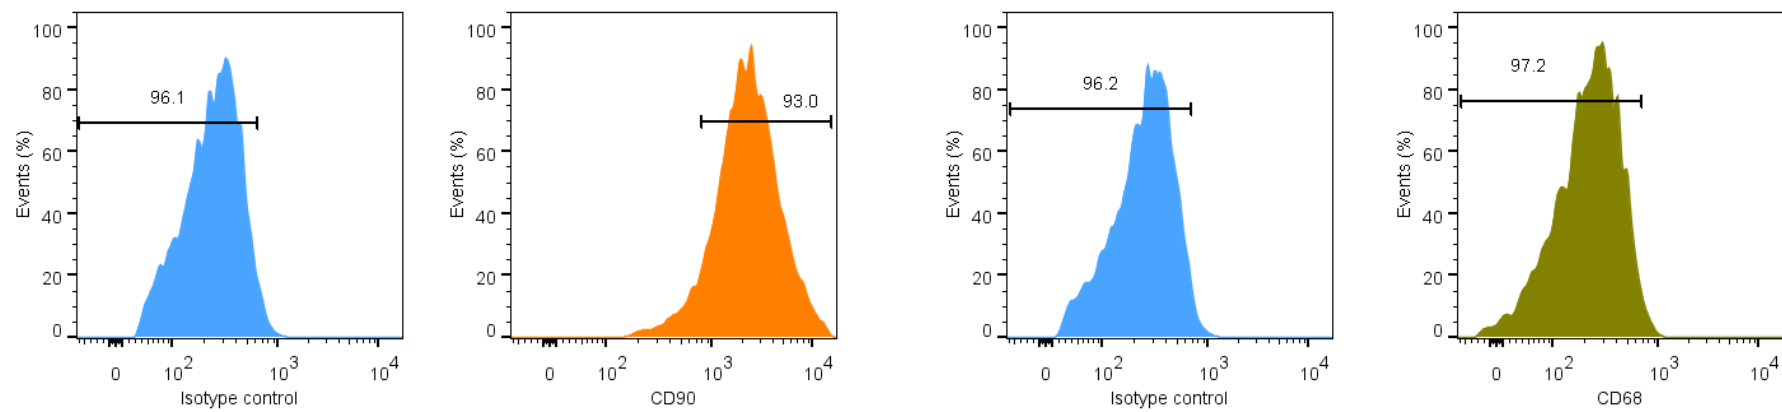**B**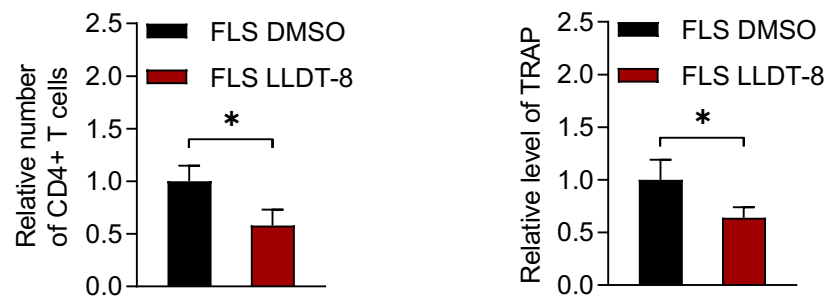

**Supplementary Fig. 1 Characterization of RA FLS and cell co-culture.** (A) Expression of cell surface markers (CD90 and CD68) and isotype controls on RA FLS, as determined by flow cytometry. (B) Co-culture of CD4<sup>+</sup> T cells or CD14<sup>+</sup> monocytes/macrophages with RA FLS. Before cell co-culture, RA FLS were treated with LLDT-8 or DMSO. Proliferative ability of CD4<sup>+</sup> T cells were examined by flow cytometry. TRAP expression in CD14<sup>+</sup> monocytes/macrophages were determined by ELISA. Data are presented as mean  $\pm$  SD. \* $P < 0.05$ . All experiments were repeated three times.

**A**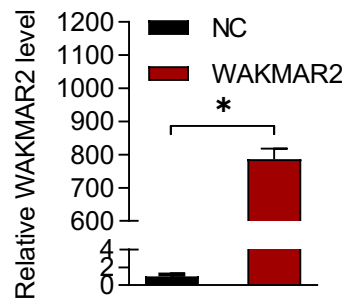**B**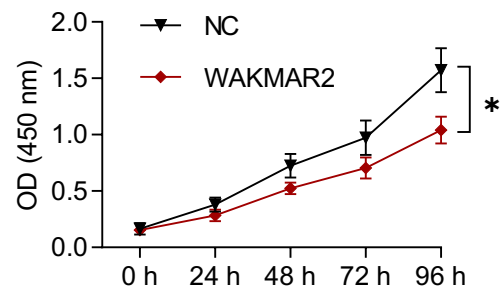**C**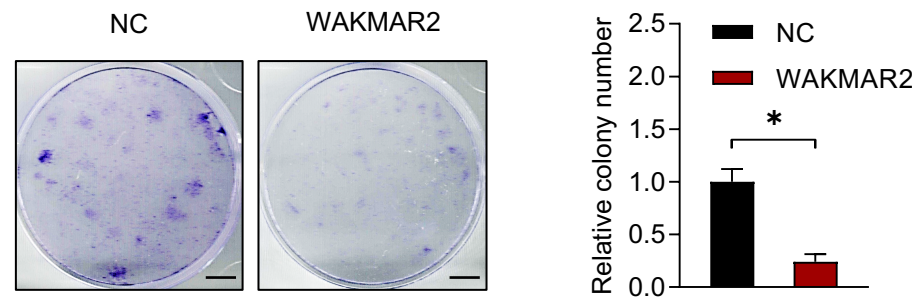**D**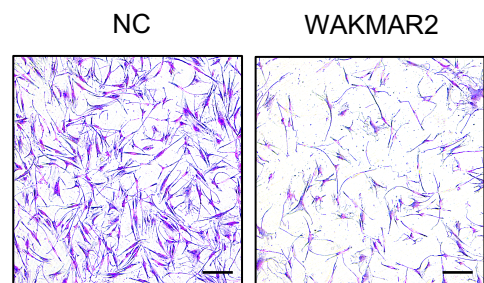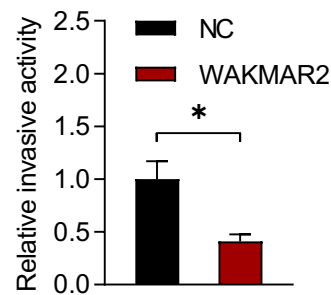**E**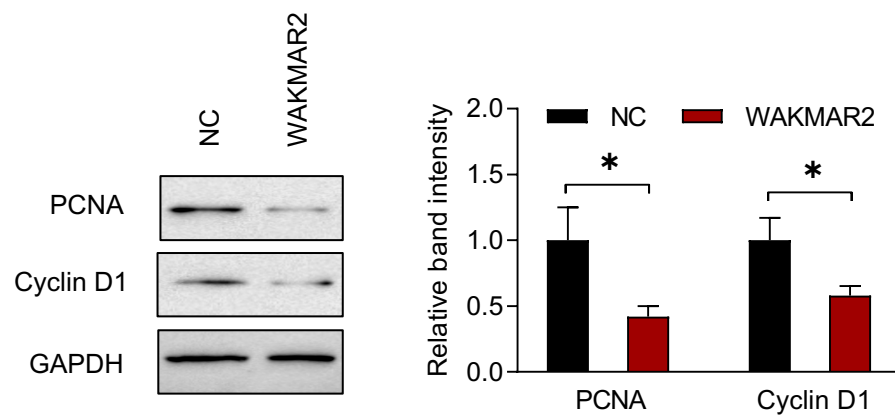**F**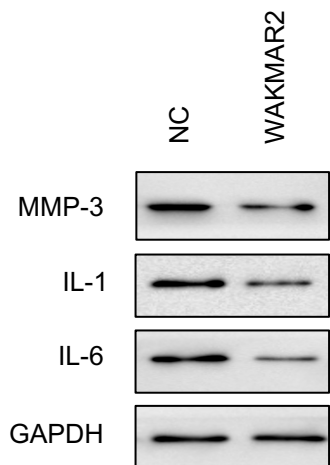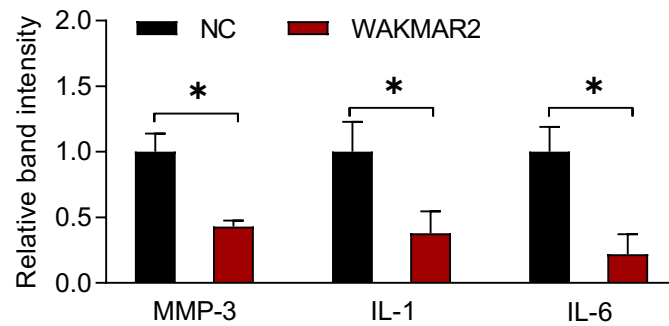**G**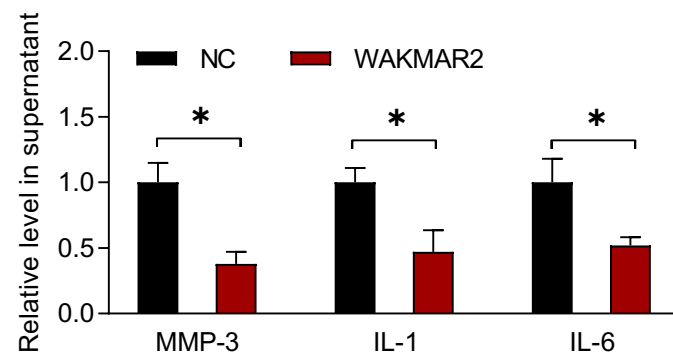

**Supplementary Fig. 2 Effects of WAKMAR2 overexpression on RA FLS.** (A) Level of WAKMAR2 in RA FLS transfected with WAKMAR2 overexpressing vector or negative control vector (NC), as determined by real-time PCR. (B) Proliferative ability of RA FLS with the above transfection, as determined by CCK-8 assay. (C) Colony formation of RA FLS with the above transfection. (D) Invasion of RA FLS with the above transfection, as determined by transwell assay. Scale bars = 200  $\mu$ m. (E) The levels of PCNA and Cyclin D1 in RA FLS with the above transfection, as determined by western blotting. (F) The levels of MMP-3, IL-1 and IL-6 in RA FLS with the above transfection, as determined by western blotting. (G) The levels of MMP-3, IL-1 and IL-6 in supernatant of RA FLS with the above transfection, as determined by ELISA. Data are presented as mean  $\pm$  SD. \* $P < 0.05$ . Both representative images and quantitative measurement of colony formation, invasion and western blotting were shown. All experiments were repeated three times.

**A**

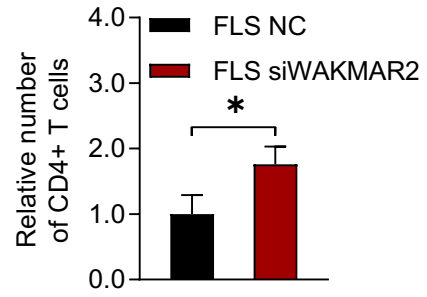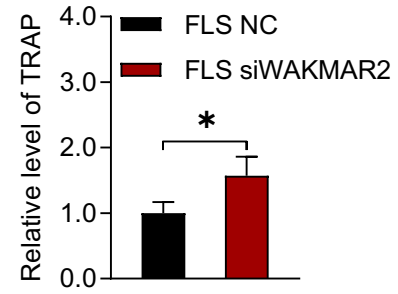

**B**

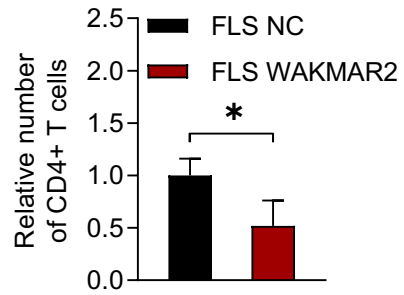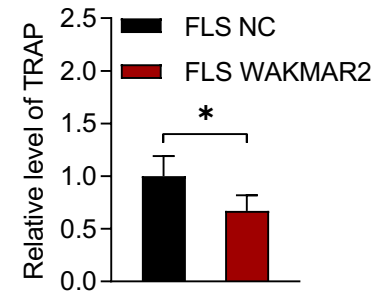

**Supplementary Fig. 3 Co-culture of T cells or monocytes/macrophages with RA FLS.** (A) Co-culture of CD4<sup>+</sup> T cells or CD14<sup>+</sup> monocytes/macrophages with RA FLS transfected with WAKMAR2 silencing vector (siWAKMAR2) or negative control vector (NC). (B) Co-culture of CD4<sup>+</sup> T cells or CD14<sup>+</sup> monocytes/macrophages with RA FLS transfected with WAKMAR2 overexpressing vector or negative control vector (NC). Proliferative ability of CD4<sup>+</sup> T cells were examined by flow cytometry. TRAP expression in CD14<sup>+</sup> monocytes/macrophages were determined by ELISA. Data are presented as mean  $\pm$  SD. \* $P < 0.05$ . All experiments were repeated three times.

**A**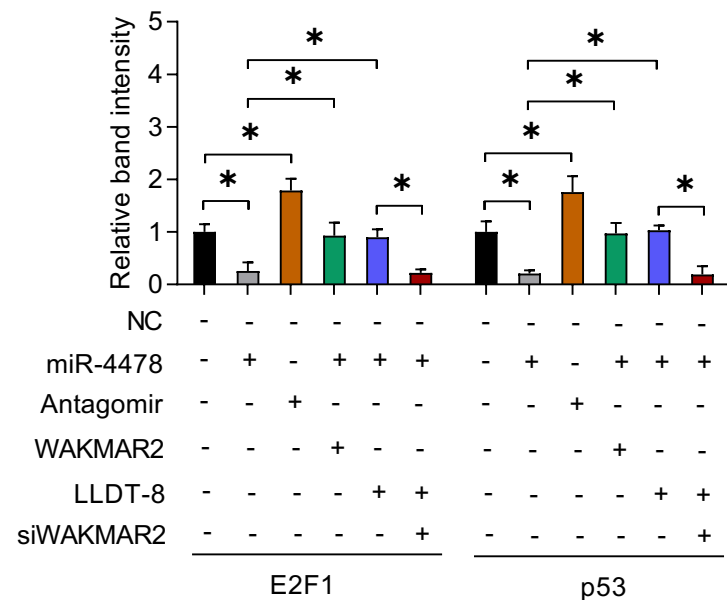**B**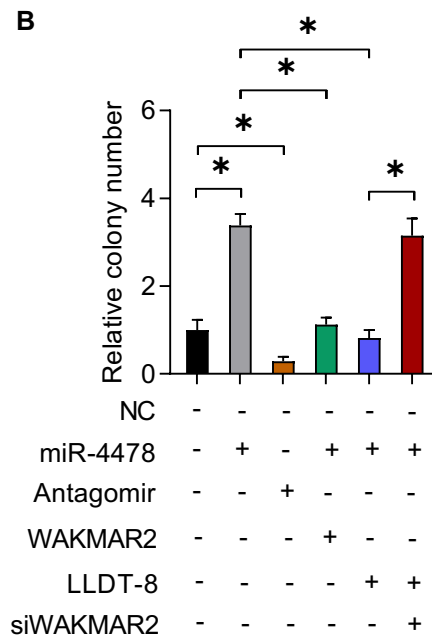**C**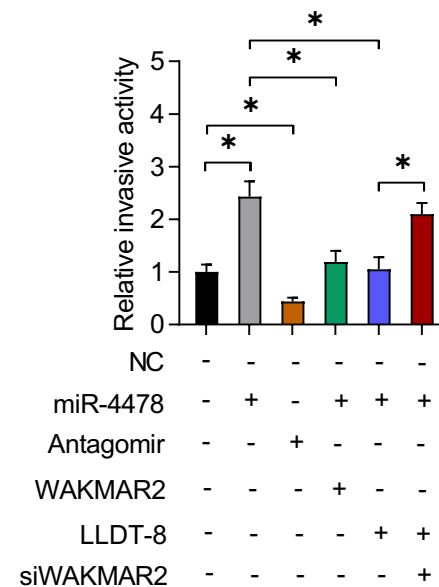**D**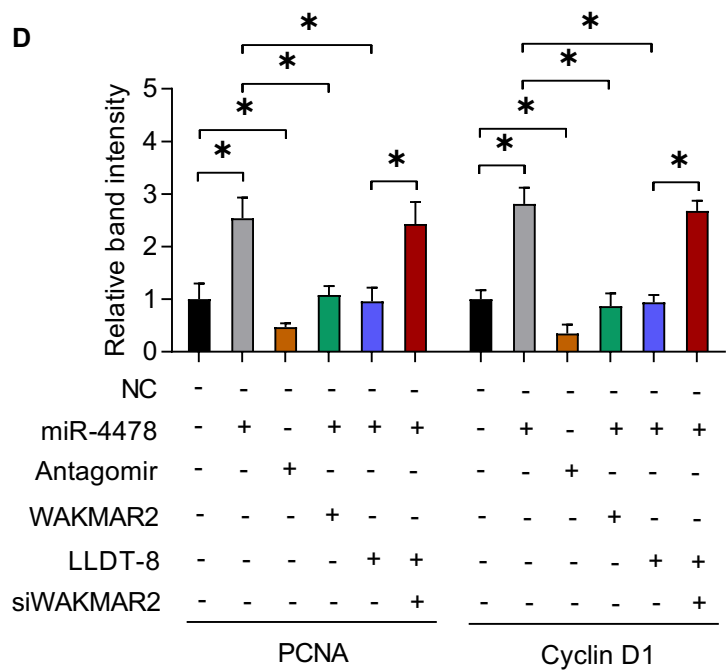**E**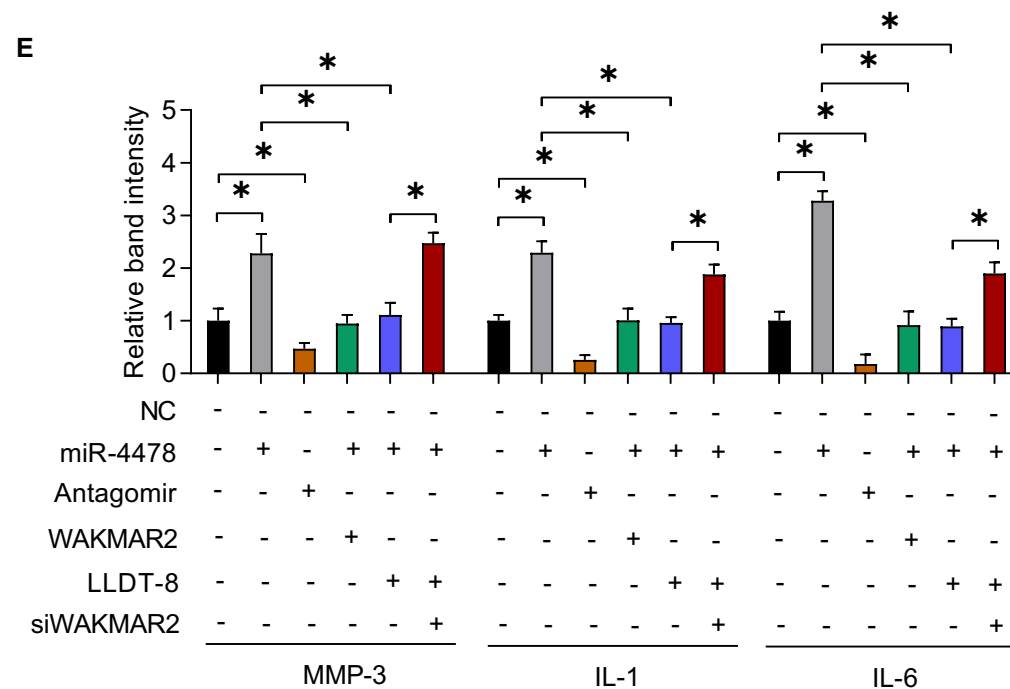

**Supplementary Fig. 4 Quantitative measurement in RA FLS.** (A) Levels of p53 and E2F1 in RA FLS transfected with miR-4478 mimic, antagomir, miR-4478 mimic + WAKMAR2 overexpression vector, miR-4478 mimic + LLDT-8 treatment or miR-4478 mimic + WAKMAR2 silencing vector (siWAKMAR2) + LLDT-8 treatment. (B) Colony formation of RA FLS with the above treatment. (C) Invasion of RA FLS with the above treatment. (D) Levels of PCNA and Cyclin D1 in RA FLS with the above treatment. (E) Levels of MMP-3, IL-1 and IL-6 in RA FLS with the above treatment. Data are presented as mean  $\pm$  SD. \* $P < 0.05$ . All experiments were repeated three times.
